# Supplementary material for: A new electrochemical synthesis route for a BiOI electrode and its conversion to a highly efficient porous BiVO4 photoanode for solar water oxidation
Source: Royal Society of Chemistry journal article supplement (doi:10.1039/c2ee22608a), 2012-01-01
Supplement: c2ee22608a.pdf [file c2ee22608a.pdf]

**New Electrochemical Synthesis Route for a BiOI Electrode and Its  
Conversion to a Highly Efficient Porous BiVO<sub>4</sub> Photoanode  
for Solar Water Oxidation**

*Kenneth J. McDonald and Kyoung-Shin Choi\**

Department of Chemistry, Purdue University, West Lafayette, IN 47907, USA

**Supporting Information**

\* Correspondence and requests for materials should be addressed to K.-S. Choi (e-mail: kchoi1@purdue.edu).

## Experimental Section

*Electrochemical synthesis of BiOI electrodes:* A standard three-electrode set-up in an undivided cell was used for all depositions. Fluorine-doped tin oxide (FTO) (sheet resistance  $\sim 8\text{-}12\ \Omega$ , Hartford Glass Company) was used as the working electrode (WE) while a platinum electrode, which was prepared by sputter coating 200 Å Ti layer followed by 1000 Å Pt layer on cleaned glass substrates, was used as the counter electrode. The reference electrode was an Ag/AgCl electrode in 4 M KCl solution, against which all the potentials reported herein were measured. A PAR VMP2 Potentiostat was used for electrodeposition and all subsequent electrochemical studies. The plating solution was prepared by dissolving 40 mM  $\text{Bi}(\text{NO}_3)_3$  (Sigma Aldrich,  $\geq 98.0\%$ ) in a 400 mM KI (Acros, 99+%) aqueous solution. The pH of the resulting opaque orange solution was adjusted to 1.75 using dilute  $\text{HNO}_3$  (Mallinckrodt, 68.0-70.0%), which converts the opaque solution to a transparent red-orange solution. 50 mM p-benzoquinone (Sigma Aldrich 98%) was then added to the solution, resulting in a dark transparent black solution with a pH of 2.6. The depositions were carried out potentiostatically at  $-0.1\ \text{V}$  for 10 min at room temperature (average current density  $-0.27\ \text{mA}/\text{cm}^2$ ). After the deposition, the electrode was rinsed with deionized water and dried with a gentle stream of nitrogen gas. Upon this layer, a second round of BiOI deposition was carried out at a higher temperature,  $75\ ^\circ\text{C}$ , in order to increase the coverage of the WE by BiOI. The plating solution was prepared by first heating a solution of 400 mM KI to  $75\ ^\circ\text{C}$  then adding 20 mM  $\text{Bi}(\text{NO}_3)_3$ . The pH of the resulting opaque orange solution was adjusted to 1.75 using dilute  $\text{HNO}_3$  converting the opaque solution to a transparent red-orange solution. The solution was then reheated to  $75\ ^\circ\text{C}$  and 50 mM p-benzoquinone was added changing the pH to 2.6. The deposition was carried out

potentiostatically on top of the existing BiOI film at -0.1 V for 10 min at 75 °C (average current density, -1.67 mA/cm<sup>2</sup>). After deposition, the electrode was rinsed with deionized water and dried with a gentle stream of nitrogen gas.

*Thermal Conversion to BiVO<sub>4</sub>:* BiVO<sub>4</sub> electrodes were prepared by pipetting 75 μL NH<sub>4</sub>OH (Macron 28.0-30.0%) solutions of 100 mM V<sub>2</sub>O<sub>5</sub> (Sigma Aldrich ≥98.0%) onto a 1 cm x 1.5 cm x ca. 2 μm BiOI layer to completely cover the BiOI crystals. The resulting wet electrode was transferred to a furnace and annealed in air at 520 °C for 6 h after a ramp rate of 2 °C/min. The annealing procedure resulted in decomposition of BiOI into Bi<sub>2</sub>O<sub>3</sub> and I<sub>2</sub>. After the solution evaporated and I<sub>2</sub> sublimed, only the remaining Bi<sub>2</sub>O<sub>3</sub> and V<sub>2</sub>O<sub>5</sub> reacted to form BiVO<sub>4</sub>. Annealing times shorter than 6 h resulted in Bi<sub>2</sub>O<sub>3</sub> impurities while annealing longer did not improve crystallinity. After the heat treatment, the electrode was soaked in 1 M NaOH (Macron, pellets) solution for 20 min while stirring to remove excess V<sub>2</sub>O<sub>5</sub> that did not react to form BiVO<sub>4</sub>.

*Deposition of FeOOH:* A layer of FeO(OH) was photodeposited onto the surface of BiVO<sub>4</sub> in a 0.1 M FeCl<sub>2</sub> (Alfa Aesar, 99%) solution (pH 4.1) while stirring. A standard three-electrode set-up in an undivided cell was used using the counter and reference electrodes mentioned above. BiVO<sub>4</sub> films were used as the working electrode. Illumination was provided using a 300 W ozone-free xenon lamp after passing through water, neutral density, and AM 1.5G filters. The intensity of the light that hit the BiVO<sub>4</sub> surface was 1.6 mW/cm<sup>2</sup>. The BiVO<sub>4</sub> electrode was illuminated through the FTO substrate (back illumination). An external bias of +0.27 V was applied to the WE during photodeposition to increase the photodeposition current, which decreased the optimum deposition time to 1 hr. After photodeposition, additional electrodeposition of FeOOH was carried out using the same FeCl<sub>2</sub> solution by applying +1.2 V

for 10 min in the dark in order to deposit on FeOOH on any bare FTO substrate exposed between BiVO<sub>4</sub> particles.

*Characterization:* Surface morphology of the electrodes was examined using a field emission scanning electron microscope (FEI Nova NanoSEM) operated at 10 kV with a working distance of approximately 5 mm. The electrodes were coated with Pt using a thermal evaporator before imaging to minimize charging problems. Samples were prepared for energy dispersive spectroscopy (EDS) by scraping films off FTO substrates and piling onto carbon tape. Since our films are thinner than the penetration depth of the X-rays used for EDS analysis, this procedure ensures that the majority of the EDS signals is generated by the sample and not by the substrate, which improves the accuracy of the results. EDS analysis was completed using an Oxford Inca system coupled to the FEI Nova NanoSEM. X-ray diffraction patterns were obtained using a Bruker D8 Focus (Cu K<sub>α</sub> radiation). UV-Vis spectra of the films were measured using a Cary 300 UV-Vis spectrophotometer in dual-beam transmittance mode with bare FTO substrate as a reference.

*Electrochemical and Photoelectrochemical Measurements:* Photoelectrochemical measurements were taken with a PAR VMP2 Potentiostat using a three-electrode configuration with the sample as the working electrode, an oversized platinum (1000 Å sputtered on glass, 200 Å Ti adhesion layer) as a counter electrode, and a Ag/AgCl (4 M KCl) reference electrode, against which all further measurements mentioned herein will be referenced. Illumination was provided by a 300 W ozone-free xenon lamp after passing through neutral density filters, a water filter, and an AM 1.5G filter into an optical fiber and calibrating the output to 100 mW/cm<sup>2</sup> using a thermopile detector from International Light. The illuminated area of the samples was either 0.1 or 0.2 cm<sup>2</sup> for all measurements. All samples were back-illuminated through the FTO glass because back-

illumination resulted in a much higher photocurrent generation. All experiments were performed in a 0.1 M potassium phosphate solution ( $\text{KH}_2\text{PO}_4$ , Alfa Aesar, ACS grade) with pH adjusted to 7 using KOH. In some experiments 0.1 M  $\text{Na}_2\text{SO}_3$  (Mallinckrodt,  $\geq 98.0\%$ ) was added to the electrolyte to compare photocurrents obtained from sulfite oxidation and water oxidation. Before photocurrent measurement, each electrode was fully illuminated until the most negative and stable open circuit potential value was obtained, which could take 10 min to 3 h. Photocurrent measurements were carried out while linearly sweeping potential in the positive direction with a scan rate of 10 mV/s or while applying a constant potential of -0.1 V vs. Ag/AgCl (4 M KCl). While all measurements were carried out using a Ag/AgCl (4 M KCl) reference electrode, results in this study were presented against reversible hydrogen electrode (RHE) for ease of comparison with the  $\text{H}_2$  and  $\text{O}_2$  redox levels and with other literature reports that used electrolytes with different pH conditions. Potentials were converted using the following equation.

$$E \text{ (vs. RHE)} = E \text{ (vs. Ag/AgCl)} + E_{\text{Ag/AgCl}} \text{ (ref)} + 0.0591 \text{ V} \times \text{pH}$$

$$(E_{\text{Ag/AgCl}} \text{ (ref)} = 0.1976 \text{ V vs. NHE at } 25 \text{ }^\circ\text{C})$$

Capacitance measurements were carried out to obtain Mott-Schottky plots using an EG&G Princeton Applied Research Potentiostat/Galvanostat Model 263A interlinked with a Princeton Applied Research FRD100 frequency response detector using the PowerSine software program. A sinusoidal modulation of 20 mV was applied at a frequency of 5 kHz or 10 kHz. The solution and the electrode set-up were identical to those used for photocurrent measurement.

*Oxygen Detection:* Oxygen was detected quantitatively using an Ocean Optics fluorescence-based oxygen sensor (FOSPOR-R 1/16"). The electrochemical cell was a custom-built air-tight two-compartment cell divided by a frit. One side held a Pt counter electrode, while the other

side held the working electrode ( $\text{BiVO}_4/\text{FeOOH}$ ) along with a  $\text{Ag}/\text{AgCl}$  reference electrode. Both sides were filled with 0.1 M phosphate buffer (pH 7) with both the electrolyte and headspace of the sealed cell purged with argon. The electrolyte in the working compartment was 30.0 mL and the headspace volume was 11.75 mL. The needle probe was inserted through a rubber septum for  $\text{O}_2$  readings throughout the experiment. The probe was calibrated using 2 points (argon, 0%  $\text{O}_2$ , and air, 20.9%  $\text{O}_2$ ), with an error of 5 % of the reading. The experiment began with 30 min of baseline  $\text{O}_2$  measurement followed by 2 h of illumination (AM 1.5G, 100  $\text{mW}/\text{cm}^2$ ) while applying 0.5 V vs. RHE. The probe measures the  $\text{O}_2$  content in the headspace and records as mole %. This was converted to  $\mu\text{mol}$  after first adjusting for the  $\text{O}_2$  dissolved in solution using Henry's Law. The charge passed during the experiment was also converted from Coulombs to  $\mu\text{mol}$ s by dividing by 4 F and multiplying by  $10^6$  ( $F = 96485 \text{ C}/\text{mol}$ ).

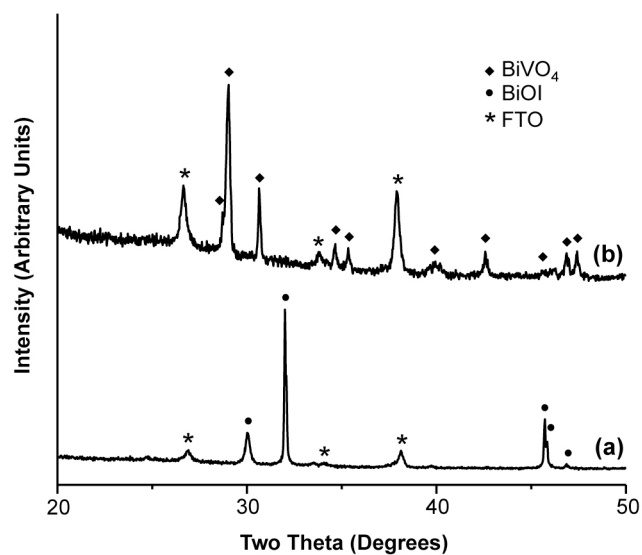

**Figure S1.** XRD patterns for (a) BiOI and (b) BiVO<sub>4</sub>.

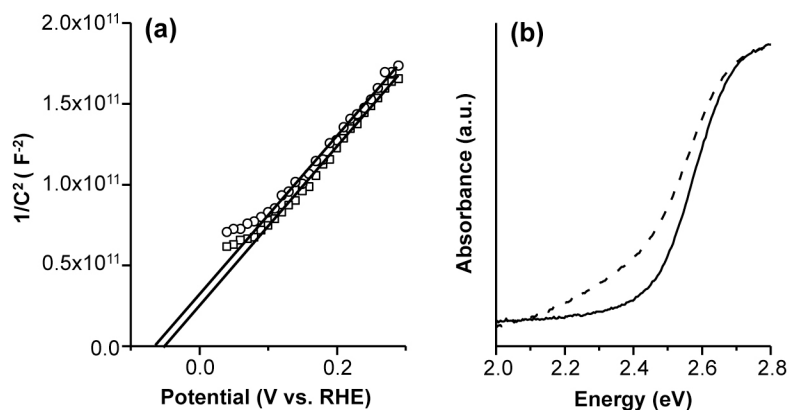

**Figure S2.** (a) Mott-Schottky plots obtained in 0.1 M phosphate buffer (pH 7) at 5 kHz (□) and 10 kHz (○) of BiVO<sub>4</sub> electrodes and (b) UV-vis absorption spectra of BiVO<sub>4</sub> (solid) and BiVO<sub>4</sub>/FeOOH electrodes (dashed).

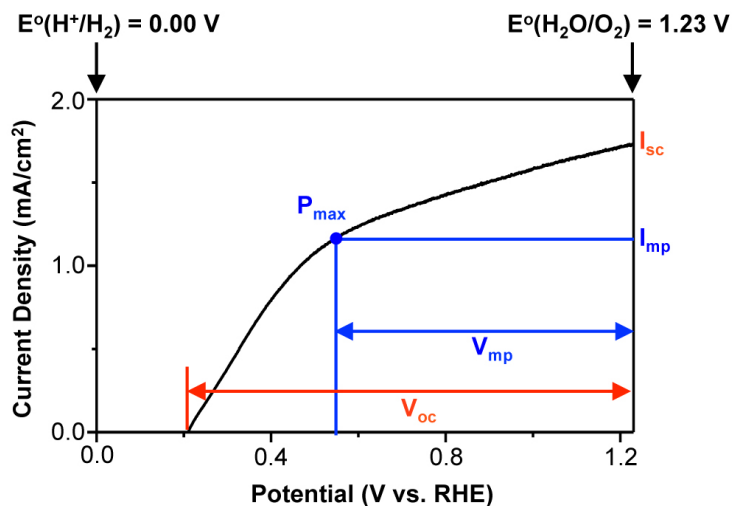

**Figure S3.** Photocurrent density ( $J$ )-voltage ( $V$ ) characteristics of  $\text{BiVO}_4/\text{FeOOH}$  photoanode in 0.1 M phosphate buffer (pH 7) (AM 1.5G,  $100 \text{ mW}/\text{cm}^2$  illumination) with a scheme showing which points are equivalent to short-circuit current ( $I_{\text{sc}}$ ) and open-circuit voltage ( $V_{\text{oc}}$ ) in a  $J$ - $V$  curve obtained using a three electrode system for a solar water oxidation half reaction.<sup>[21]</sup> The current and voltage at maximum power point,  $P_{\text{max}}$ , is denoted as  $I_{\text{mp}}$  and  $V_{\text{mp}}$ , respectively. Then the fill factor can be calculated by  $(I_{\text{mp}} \times V_{\text{mp}})/(I_{\text{sc}} \times V_{\text{oc}})$ . Our  $\text{BiVO}_4/\text{FeOOH}$  photoanode has  $V_{\text{oc}} = 1.02 \text{ V}$ ,  $I_{\text{sc}} = 1.72 \text{ mA}/\text{cm}^2$ ,  $V_{\text{mp}} = 0.68 \text{ V}$ ,  $I_{\text{mp}} = 1.17 \text{ mA}/\text{cm}^2$  and fill factor = 0.48 for the solar water oxidation half reaction.
